# Supplementary material
Source: PubMed Central journal article supplement (PMC6216252)

# Figure 1

**B**

AKAP450 (7/AK)

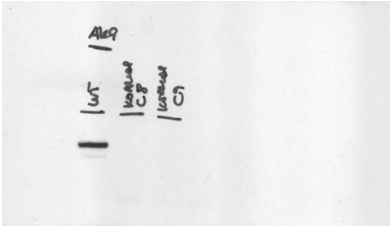

PCNT (Abc-R)

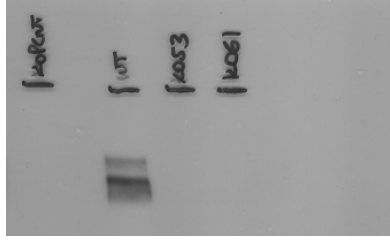

CDK5Rap2 (Mi)

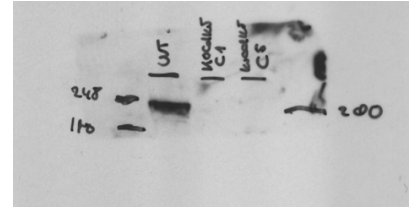

GM130

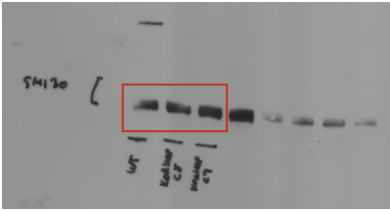

GM130

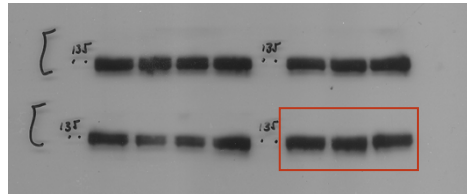

GM130

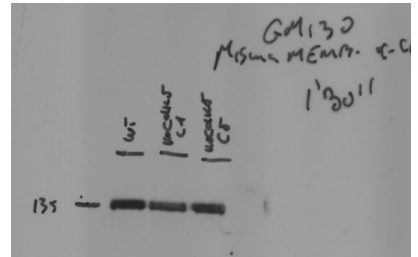

**D**

AKAP450 (A24)

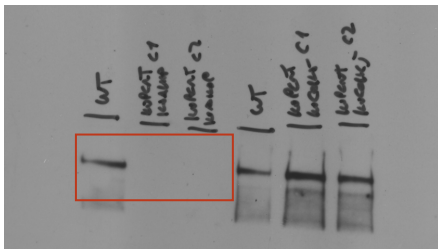

CDK5Rap2-

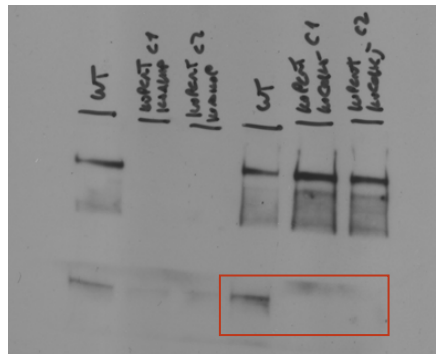

GM130-

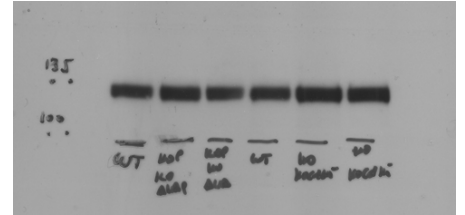

**E**

AKAP450

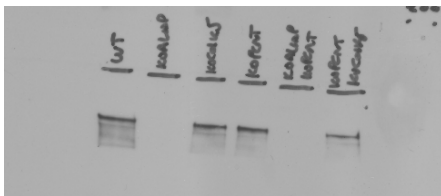

CDK5Rap2

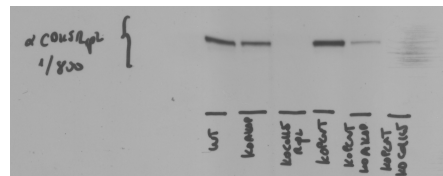

PCNT

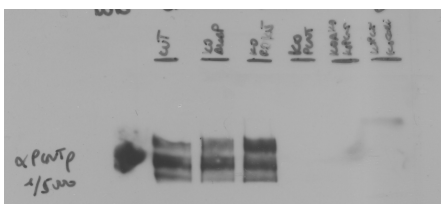

Hsp70

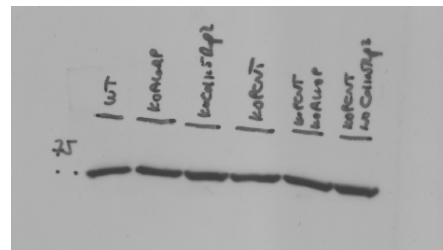

Supplement: EMBR-19-e45942-s003.pdf [file EMBR-19-e45942-s003.pdf]

Figure 3

A

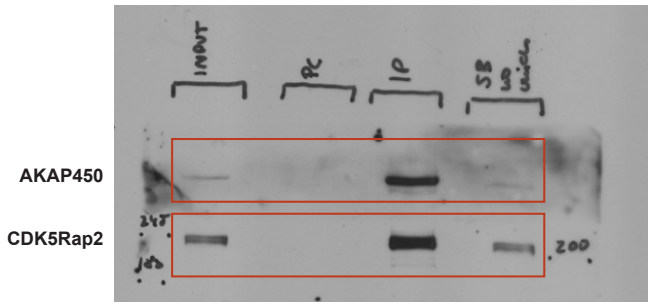

$\gamma$ -tubulin

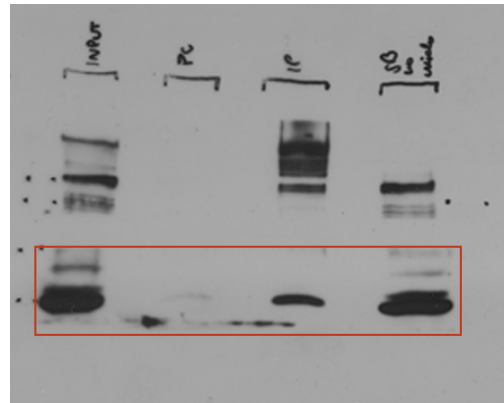

B

PCNT

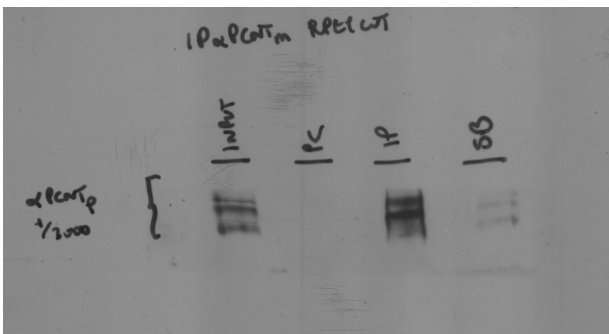

CDK5Rap2

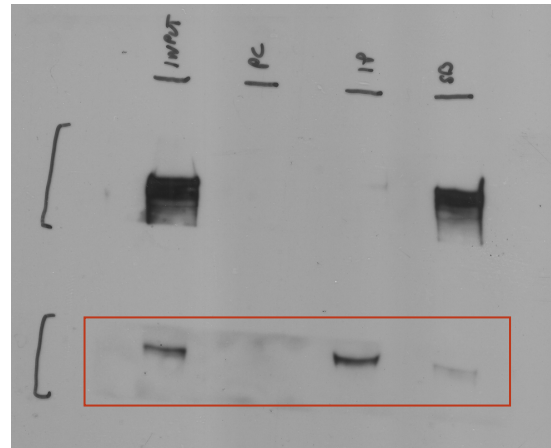

AKAP450

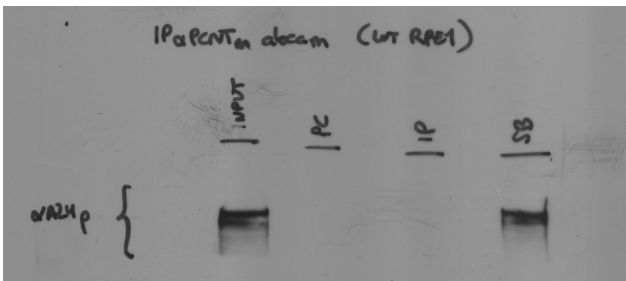

$\gamma$ -tubulin

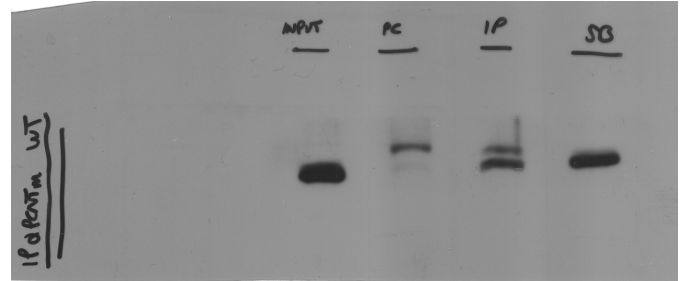

Supplement: EMBR-19-e45942-s004.pdf [file EMBR-19-e45942-s004.pdf]
